# Supplementary material
Source: publisher site journal article supplement (https://www.spandidos-publications.com/4178/downloadSupplementary)
Supplement: Supplementary file 1 [file downloadSupplementary]

## Sheet: TableS9-hub_miRNA
Table SIX. The detail miRNAs to construct ceRNA.
gene_names	UP_DOWN
hsa-let-7c-5p	Down
hsa-miR-100-5p	Down
hsa-miR-145-5p	Down
hsa-miR-20b-5p	Down
hsa-miR-28-5p	Down
hsa-miR-29b-2-5p	Down
hsa-miR-30a-5p	Down
hsa-miR-411-5p	Down
hsa-miR-451a	Down
hsa-miR-6507-5p	Down
hsa-miR-99a-3p	Down
hsa-miR-99a-5p	Down
hsa-miR-194-3p	Up
hsa-miR-4326	Up
hsa-miR-615-3p	Up
hsa-miR-935	Up
hsa-miR-937-3p	Up
